# Supplementary material for: Maternal Gliadin Intake Reduces Oocyte Quality with Chromosomal Aberrations and Increases Embryonic Lethality through Oxidative Stress in a Caenorhabditis elegans Model
Source: MDPI journal article supplement (doi:10.3390/nu14245403), 2022-12-19
Supplement: s1 [file s1]

**Supplementary Table S1. List of quantitative real-time PCR primers**

| Name                  | Primer sequence (5'-3')         |
|-----------------------|---------------------------------|
| <i>cdc-42</i> forward | 5'-AGCCATTCTGGCCGCTCTCG-3'      |
| <i>cdc-42</i> reverse | 5'-GCAACCGCTTCTCGTTTGGC-3'      |
| <i>ctl-1</i> forward  | 5'-CGGATACCGTACTCGTGATGAT-3'    |
| <i>ctl-1</i> reverse  | 5'-CCAAACAGCCACCCAAATCA-3'      |
| <i>ctl-3</i> forward  | 5'-AGTAAATCTTCAAAATGCCAATG-3'   |
| <i>ctl-3</i> reverse  | 5'-GGTGGGGTTCCTGATTCTAT-3'      |
| <i>gst-4</i> forward  | 5'-CGTTTTCTATGGAAGTGACGC-3'     |
| <i>gst-4</i> reverse  | 5'-TCAGCCCAAGTCAATGAGTC-3'      |
| <i>sod-1</i> forward  | 5'-ATTCTGCCGGTCCACACTT-3'       |
| <i>sod-1</i> reverse  | 5'-CCATAGATCGGCCAACGACA-3'      |
| <i>sod-2</i> forward  | 5'-GAGGCGGTCTCCAAAGGAAA-3'      |
| <i>sod-2</i> reverse  | 5'-GAACAGCGACAGTTGATGCC-3'      |
| <i>sod-3</i> forward  | 5'-GGATGGTGGAGAACCTTCAA-3'      |
| <i>sod-3</i> reverse  | 5'-AAGGATCCTGGTTTGACAG-3'       |
| <i>sod-4</i> forward  | 5'-GAAGCTTAACGGATCGGTTCCGGA-3'  |
| <i>sod-4</i> reverse  | 5'-TGCACCATGGCTCAGCTTATGAGGA-3' |
| <i>prdx-3</i> forward | 5'-GTTCCGTTCTCTTGGAGCTG-3'      |
| <i>prdx-3</i> reverse | 5'-CTTGTTGAAATCAGCGAGCA-3'      |
| <i>prdx-6</i> forward | 5'-GGAGAACAATGGCTGATGC-3'       |
| <i>prdx-6</i> reverse | 5'-ATCTGAACATGGCGTTTGC-3'       |
